# Supplementary material for: A critical evaluation of decadal solar cycle imprints in the MiKlip historical ensemble simulations
Source: Copernicus journal article supplement (doi:10.5194/wcd-4-789-2023), 2023-09-11
Supplement: Supplementary file 1 [file wcd-4-789-2023-supplement.pdf]

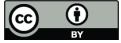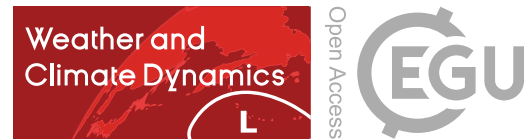

*Supplement of*

## **A critical evaluation of decadal solar cycle imprints in the MiKlip historical ensemble simulations**

**Tobias C. Spiegl et al.**

*Correspondence to:* Tobias C. Spiegl ([tobias.spiegl@met.fu-berlin.de](mailto:tobias.spiegl@met.fu-berlin.de))

The copyright of individual parts of the supplement might differ from the article licence.

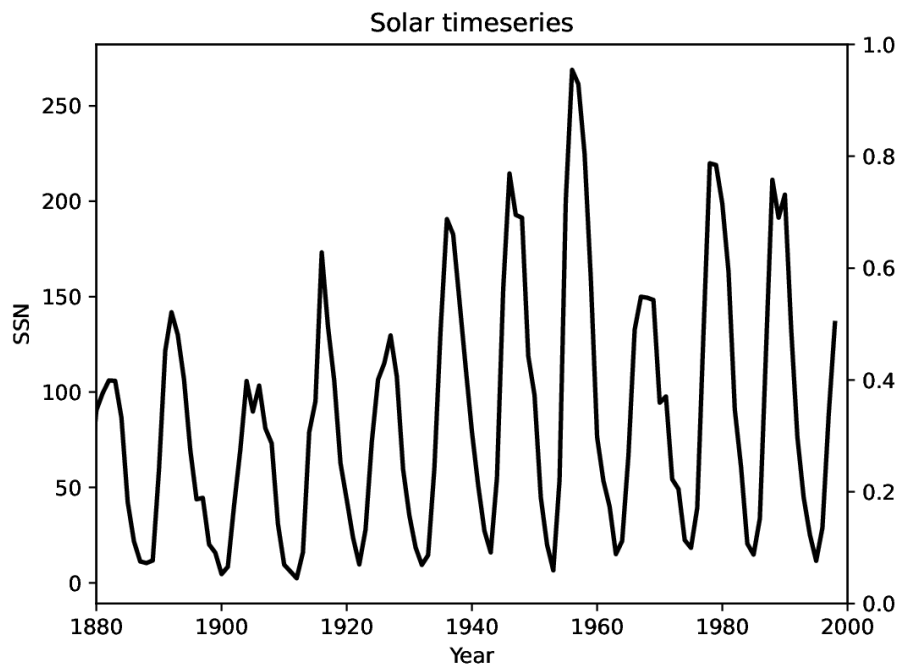

**Figure S1:** Original (unfiltered) time series of the sunspot number between 1880 and 1999. Source: WDC-SILSO, Royal Observatory of Belgium, Brussels - <https://www.sidc.be/silso/infosnmtot>

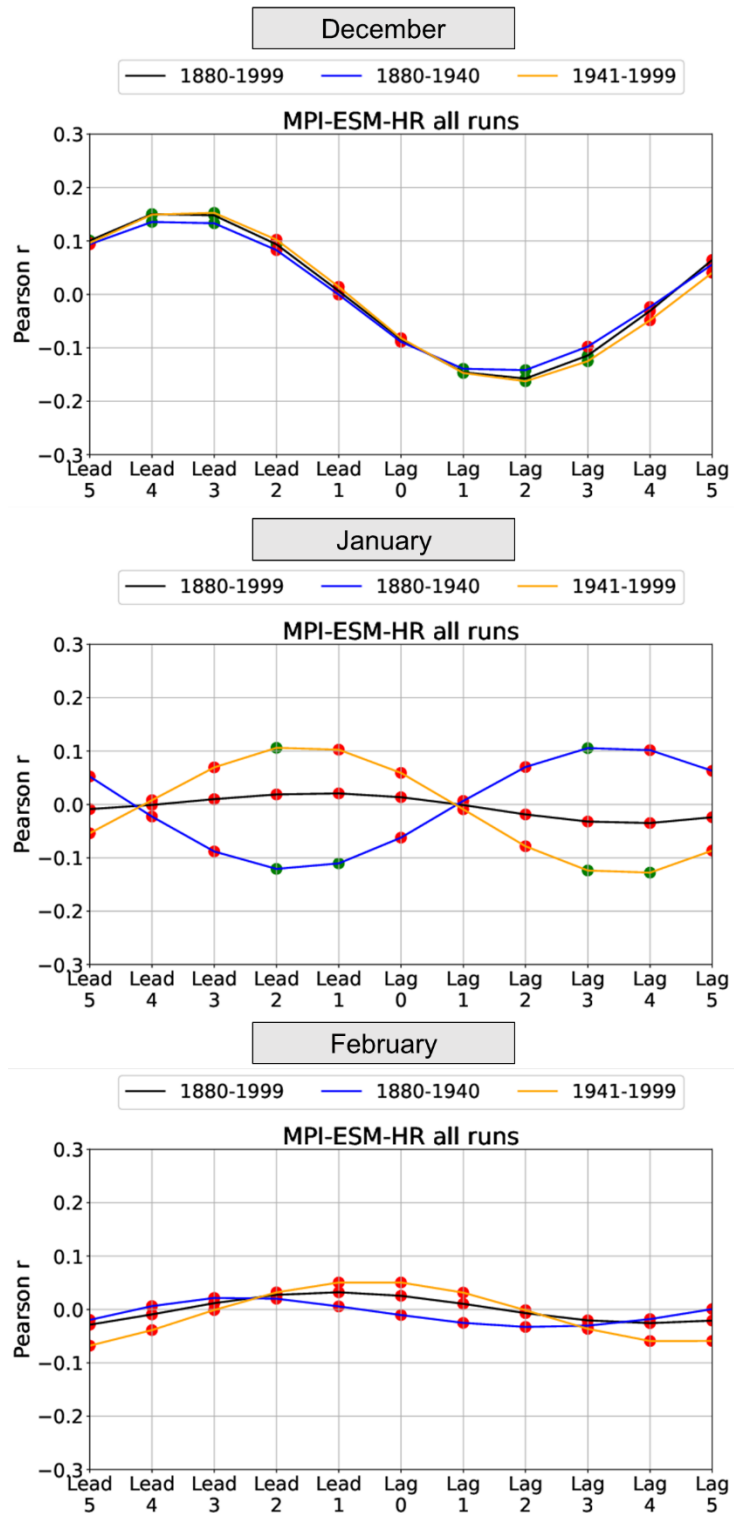

**Figure S2:** Lead/lag-correlations between the bandpass filtered (December, January, February) NAO (PC1) and SSN time series for the ensemble mean of the MPI-ESM-HR historical simulations in different periods. Green dots mark statistically significant (95%) correlations.
